# Supplementary material for: The effects of aging and hearing impairment on listening in noise
Source: PubMed Central journal article supplement (PMC10981015; doi:10.1016/j.isci.2024.109295), 2024-02-20
Supplement: mmc1.pdf [file mmc1.pdf]

iScience, Volume 27

## **Supplemental information**

### **The effects of aging and hearing impairment on listening in noise**

**Ádám Boncz, Orsolya Szalárdy, Péter Kristóf Velősy, Luca Béres, Robert Baumgartner, István Winkler, and Brigitta Tóth**

## Supplemental Information

**Table S1.** The subset of items from the HHIE administered in study, Related to the Subjective hearing impairment questionnaire section of Method Details in STAR Methods.

|                                                                                                         |
|---------------------------------------------------------------------------------------------------------|
| <i>1. Does a hearing problem cause you to feel embarrassed when you meet new people?</i>                |
| <i>2. Does a hearing problem cause you to feel frustrated when talking to family members?</i>           |
| <i>3. Do you have difficulty hearing when someone speaks in a whisper?</i>                              |
| <i>4. Do you feel handicapped by a hearing problem?</i>                                                 |
| <i>5. Does a hearing problem cause you difficulty when visiting friends, relatives, or neighbors?</i>   |
| <i>6. Does a hearing problem cause you to attend religious services less often than you would like?</i> |
| <i>7. Does a hearing problem cause you to have arguments with family members?</i>                       |
| <i>8. Does a hearing problem cause you difficulty listening to television or radio?</i>                 |
| <i>9. Do you feel that difficulty with your hearing limits/hampers your personal or social life?</i>    |
| <i>10. Does a hearing problem cause you difficulties when in a restaurant?</i>                          |
